# Supplementary material for: Non-Vascular Ceramic Sherds Coming from Two Italian Etruscan Settlements: Peculiarities and Interpretation of Their Possible Use
Source: MDPI journal article supplement (doi:10.3390/heritage5030075), 2022-06-26
Supplement: s1 [file s1]

# Non-Vascular Ceramic Sherds Coming from Two Italian Etruscan Settlements: Peculiarities and Interpretation of Their Possible Use

Margherita Cantelli, Dafne Cimino, Alberta Facchi, Raymond J. Phaneuf and Elisabetta Zendri

## Supplementary Materials

### S1 Archaeological information

This section presents supplementary information about the archaeological sites and findings considered in this study. Figure S1.1 displays the territorial map of the Po Delta at the time of the Etruscan settlements of San Basilio di Ariano nel Polesine, Adria and Spina.

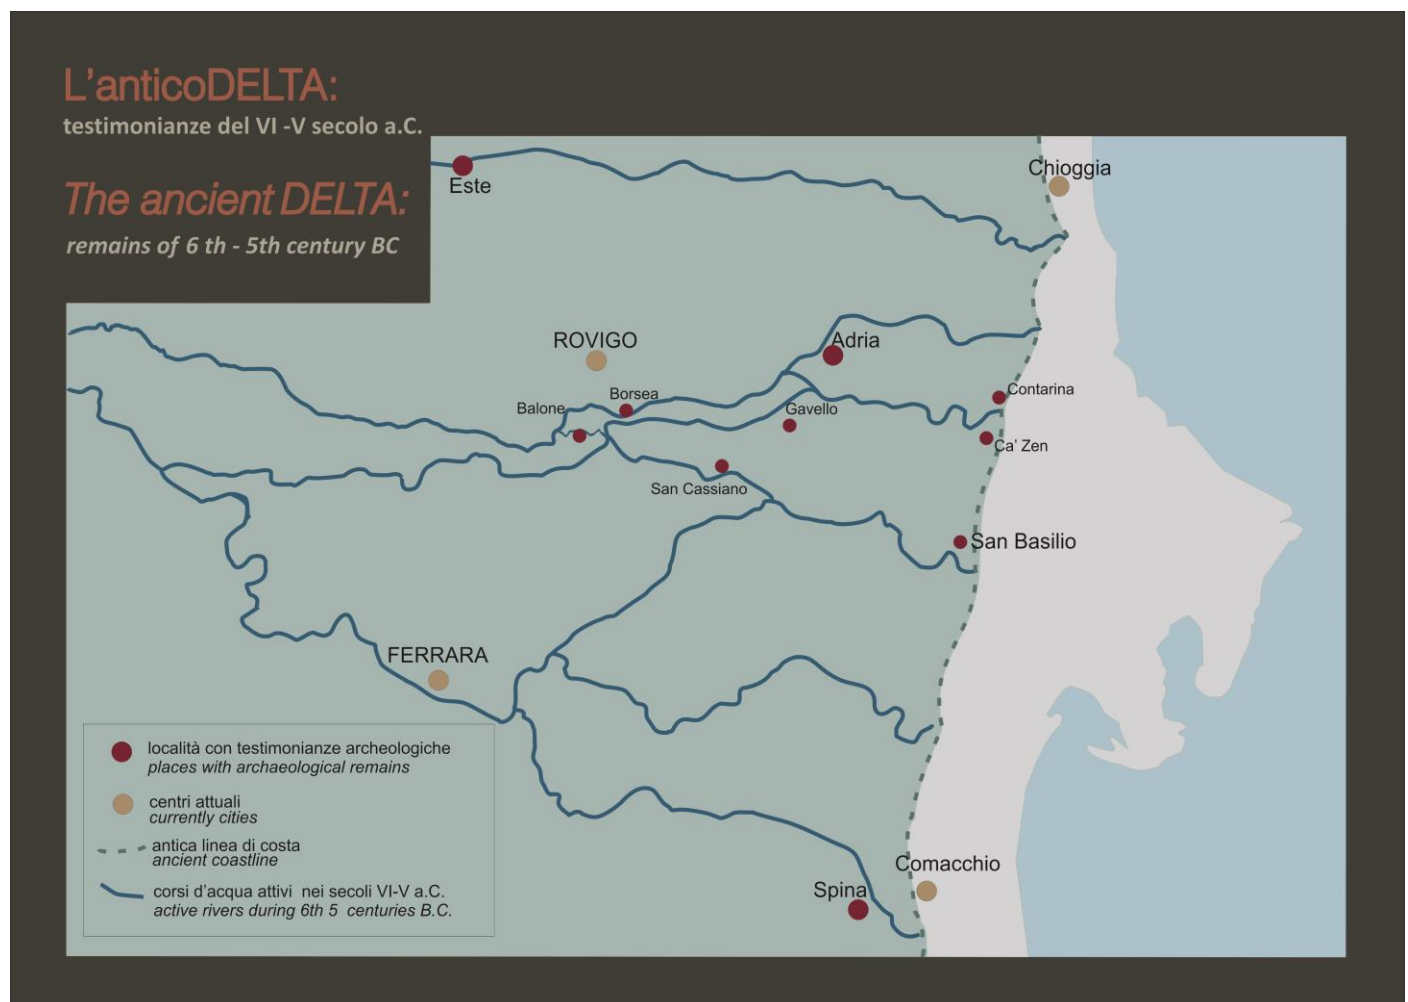

**Figure S1.** The ancient Po Delta with the Etruscan settlements of S. Basilio, Adria and Spina (Credits: Dr Sandra Bedetti).

Table S1 and S2 list additional information about the considered archaeological fragments from the sites of San Basilio and Adria respectively. Since they are stored in the warehouse of the National Archaeological Museum of Adria, the location refers to boxes and bags containing each fragment. For practical use, it was decided to label all the fragments with a coloured tag with the purpose of making them more easily identifiable. The strata description is also reported for each bag.

**Table S1.** Samples tag and strata description, SB83 site.

| Tag  | Box | Bag | n°      | Strata description                                                                                                                                                                 | Total number |
|------|-----|-----|---------|------------------------------------------------------------------------------------------------------------------------------------------------------------------------------------|--------------|
| O WR | 62  | 6   | 1-2     |                                                                                                                                                                                    |              |
| O WR | 62  | 7   | 3-11    |                                                                                                                                                                                    |              |
| O WR | 62  | 2   | 12-14   |                                                                                                                                                                                    | 14           |
| GR   | 79  | 4   | 1-5     |                                                                                                                                                                                    |              |
| GR   | 79  | 3   | 6-16    | 2 <sup>nd</sup> week probe - east - concentration of potsherds below the <i>concotti alti</i> at the level of the <i>concotti bassi</i> (construction material)                    |              |
| GR   | 79  | 8   | 17-21   | 1 <sup>st</sup> stratum. At the level of <i>concotti alti</i> (construction material)                                                                                              | 21           |
| W    | 107 | 4   | 1-46    | 2 <sup>nd</sup> week probe - western sector - western enlargement in the anthropic level (1 <sup>st</sup> and 2 <sup>nd</sup> strata)                                              | 46           |
| P    | 107 | 6   | 1-19    | 2 <sup>nd</sup> week probe - western sector - western enlargement from the stratum affected by the plow to the underneath anthropic level below the sand (2 <sup>nd</sup> stratum) | 19           |
| V    | 107 | 1   | 1-4     | 2 <sup>nd</sup> week probe - western sector - western enlargement between the anthropic level and the sterile sand (3 <sup>rd</sup> stratum)                                       |              |
| V    | 107 | 3   | 5-6     |                                                                                                                                                                                    | 6            |
| P    | 108 | 2   | 101-4   |                                                                                                                                                                                    | 4            |
| P    | 108 | 4   | 105     |                                                                                                                                                                                    | 1            |
| P    | 108 | 6   | 106     |                                                                                                                                                                                    | 1            |
| BL   | 109 |     | 1-18    | Western sector towards the southern wall - grey clay stratum                                                                                                                       | 18           |
| BR   | 109 |     | 1       |                                                                                                                                                                                    |              |
| BR   | 109 |     | 2-8     |                                                                                                                                                                                    | 8            |
| R    | 110 |     | 1-10    | West - below the <i>battuti bassi</i> until the wood                                                                                                                               | 10           |
| Y    | 110 |     | 1-58    | <i>Concotto superiore</i> pieces belonged to the further prolongation towards west                                                                                                 |              |
| Y    | 110 |     | 101-102 | <i>Concotto superiore</i> pieces belonged to the further prolongation towards west                                                                                                 | 60           |
| OR   | 142 |     | 1-40    | 2 <sup>nd</sup> week probe - western sector - western enlargement - stratum between sand and the anthropic level (2 <sup>nd</sup> stratum)                                         | 40           |
|      |     |     |         |                                                                                                                                                                                    | <b>248</b>   |

**Table S2.** Samples tag and US description, AER16 site.

| Tag | Box | n°      | US                          | US description                                                                                                                                                                                                                       | Total number |
|-----|-----|---------|-----------------------------|--------------------------------------------------------------------------------------------------------------------------------------------------------------------------------------------------------------------------------------|--------------|
| R   | 11  | 301-303 | US 3264 A                   |                                                                                                                                                                                                                                      | 5            |
| R   | 11  | 304     | US 3268/4128                | 3268 - flood deposit. Covers 4072, 4065. Covered by 4020                                                                                                                                                                             |              |
| R   | 11  | 305     | US 3264 B                   |                                                                                                                                                                                                                                      |              |
| W   | 12  | 301     | US 4063                     | Flood deposit, clay-loam level. Covers 4095. Covered by 4072, 4065                                                                                                                                                                   | 38           |
| W   | 12  | 302-304 | US 4003 B                   |                                                                                                                                                                                                                                      |              |
| W   | 12  | 305-307 | US 4108                     | Contest with pottery near US 4107 into the N/S ditch                                                                                                                                                                                 |              |
| W   | 12  | 308-311 | US 4096                     | Gray-green clay-loam level in room 1-2, structure A                                                                                                                                                                                  |              |
| W   | 12  | 312-313 | US 4024                     | Infill of clasts into the ditch 4025-                                                                                                                                                                                                |              |
| W   | 12  | 314     | US 4064                     | 1 <sup>st</sup> anthropic level pertaining to room 1 e 2 of structure A. This level is laterally linked to some <i>lamina di pulizia</i> concerning the fireplace (4038 B e 4034 B). Covers 4122. Covered by 4095/4063               |              |
| W   | 12  | 315     | US 4096                     | Gray-green clay-loam level in room 1-2, structure A                                                                                                                                                                                  |              |
| W   | 12  | 316-321 | US 4063 cer                 | Flood deposit, clay-loam level. Covers 4095. Covered by 4072, 4065                                                                                                                                                                   |              |
| W   | 12  | 322-338 | US 4098                     | High infill of the N/S ditch, subsequent to the abandonment of the area and to the partial deterioration of structures A-B. Composed of wooden debris coming from the decomposition of that structures. Covers 4150. Covered by 4095 |              |
| Y   | 13  | 301     | US 4037 A                   |                                                                                                                                                                                                                                      | 33           |
| Y   | 13  | 302-304 | US 4034                     | Walking surface above fireplace, in phase with 4038 A/B; new eastern section                                                                                                                                                         |              |
| Y   | 13  | 305-321 | US 4095<br>FITT+CER         | Flood deposit in area, at the base of 4063, composed of coarse sand. Covers 4044. Covered by 4063                                                                                                                                    |              |
| Y   | 13  | 322-333 | US 4140-4141                |                                                                                                                                                                                                                                      |              |
| P   | 14  | 301-302 | US 4086/4063                | Flood clastic deposit infilling the northern ditch                                                                                                                                                                                   |              |
| P   | 14  | 303     | US 3268 C                   | 3268 flood deposit. Covers 4072, 4065. Covered by 4020.                                                                                                                                                                              | 24           |
| P   | 14  | 304-319 | US 4065                     | Clay tiles platform placed horizontally forming a flat surface; S/E sector. Covers 4063. Covered by 3268C                                                                                                                            |              |
| P   | 14  | 320-322 | US 4095                     | Flood deposit in area, at the base of 4063, composed of coarse sand. Covers 4044. Covered by 4063                                                                                                                                    |              |
| P   | 14  | 3 A/B   | US 4201                     | Flood soil above the low beams located below plinths of room 3                                                                                                                                                                       |              |
| OR  | 15  | 301     | US 4149                     | First infill of drain ditch US4097                                                                                                                                                                                                   |              |
| OR  | 15  | 302     | US edificio 3 /<br>saggio 3 |                                                                                                                                                                                                                                      | 25           |
| OR  | 15  | 303-305 | US 4082                     |                                                                                                                                                                                                                                      |              |
| OR  | 16  | 306     | US 3264 B                   |                                                                                                                                                                                                                                      |              |
| OR  | 16  | 307-309 | US 4084                     |                                                                                                                                                                                                                                      |              |
| OR  | 16  | 310     | US 4003 A                   |                                                                                                                                                                                                                                      |              |
| OR  | 16  | 311     | US 4003                     |                                                                                                                                                                                                                                      |              |
| OR  | 16  | 312     | US 4068                     | Infill of ditch (US 4069-) with bricks remains and lumps. Covers US 4070. Covered by 3268C                                                                                                                                           |              |
| OR  | 16  | 313-314 | US 4095                     | Flood deposit in area, at the base of 4063, composed of coarse sand. Covers 4044. Covered by 4063                                                                                                                                    |              |
| OR  | 16  | 315-324 | US 4003 A                   |                                                                                                                                                                                                                                      |              |
| OR  | 16  | 325     | US 4149                     | First infill of the ditch 4097-                                                                                                                                                                                                      |              |
| BL  | 17  | 301-309 | AER 15 US<br>3264 C / 3270  |                                                                                                                                                                                                                                      |              |

|    |    |         |         |                                                                                                                                                                                                                                      |     |
|----|----|---------|---------|--------------------------------------------------------------------------------------------------------------------------------------------------------------------------------------------------------------------------------------|-----|
| BL | 17 | 310-331 | US 4106 | Discharge of fragmented tiles on the western side of the E/W ditch                                                                                                                                                                   |     |
| BL | 17 | 332-337 | US 4098 | High infill of the N/S ditch, subsequent to the abandonment of the area and to the partial deterioration of structures A-B. Composed of wooden debris coming from the decomposition of that structures. Covers 4150. Covered by 4095 |     |
| BL | 17 | 338-345 | US 4020 | Anthropic stratum with carbonaceous lenses and overcooked clasts. Frequentation/growth level with beams and wooden fingerprints                                                                                                      |     |
| BL | 17 | 346-351 | US 4020 |                                                                                                                                                                                                                                      |     |
| BL | 17 | 352-353 | US 4003 |                                                                                                                                                                                                                                      |     |
| BL | 17 | 354-376 | US 4106 | Discharge of fragmented tiles on the western side of the E/W ditch                                                                                                                                                                   | 76  |
|    |    |         |         |                                                                                                                                                                                                                                      | 201 |

## S2 Morphological characterization

This unit presents the photographic documentation of a representative sample for each different group.

**Table S3.** SB83 groups subdivision.

| SB83                                                                                |                                                                                     |                                                                                      |                                                                                       |
|-------------------------------------------------------------------------------------|-------------------------------------------------------------------------------------|--------------------------------------------------------------------------------------|---------------------------------------------------------------------------------------|
| Group A                                                                             | Group C1                                                                            | Group C2                                                                             | Group G                                                                               |
| 41W                                                                                 | 2P                                                                                  | 20Y                                                                                  | 102Y                                                                                  |
|  |  |  |  |

Table S4. AER16 groups subdivision.

| AER16                                                                              |                                                                                    |                                                                                     |
|------------------------------------------------------------------------------------|------------------------------------------------------------------------------------|-------------------------------------------------------------------------------------|
| Group 1                                                                            | Group 2                                                                            | Group 3                                                                             |
| 302Y                                                                               | 303BL                                                                              | 313OR                                                                               |
|   |   |   |
| Group 4                                                                            | Group 5                                                                            | Group 6                                                                             |
| 328W                                                                               | 303Y                                                                               | 361BL                                                                               |
|  |  |  |

### S3 FTIR analyses

This chapter reports additional spectra concerning FTIR analysis of samples from group 6. Figure S2 displays the spectrum of sample 323W, revealing the presence of gypsum in the superficial part of the fragment; Figure S3 shows the transmission mode FTIR spectrum of sample 367BL denoting distinctive vibrational signs of sulphate group also in the bulk

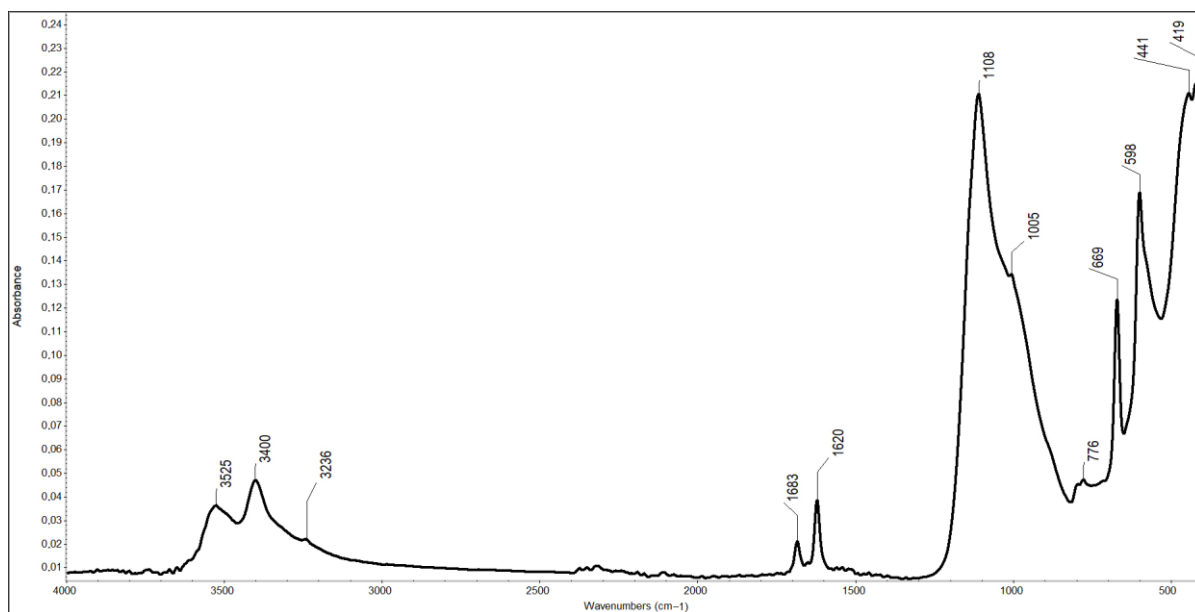

Figure S2. FTIR-ATR spectrum of 323W\_6 sample; side A.

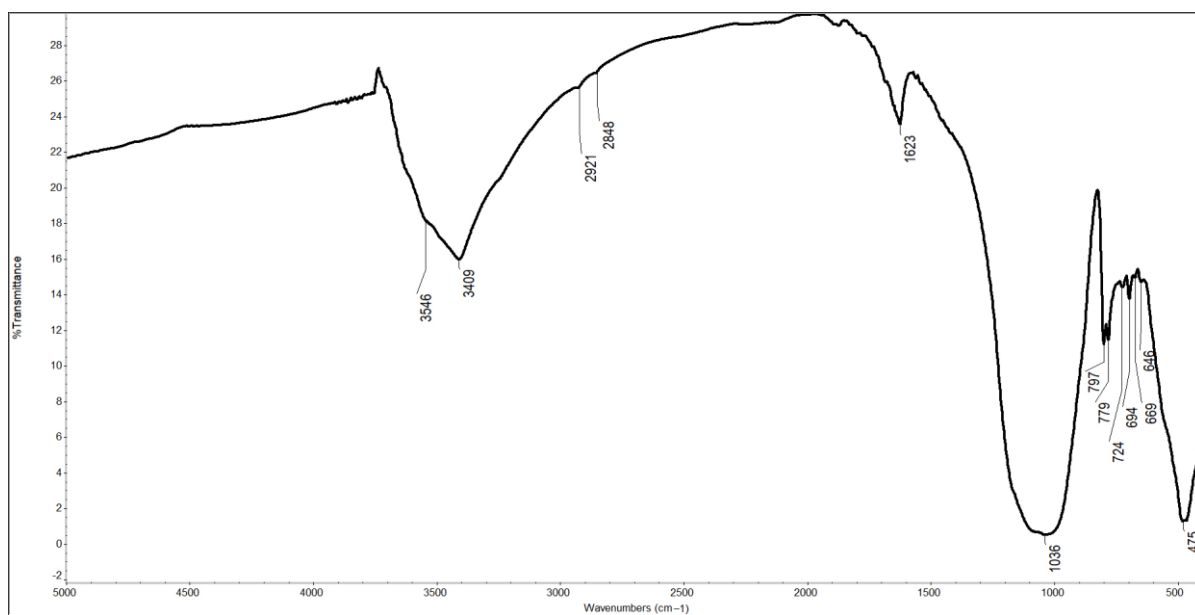

Figure S3. FTIR spectrum of 367BL\_6 sample; bulk.

## S4 Water absorption test

While in the text is reported the average of the results of the absorption test carried out on ceramic sherds, here the absorption curves of all the samples are presented, divided in the three observed trends.

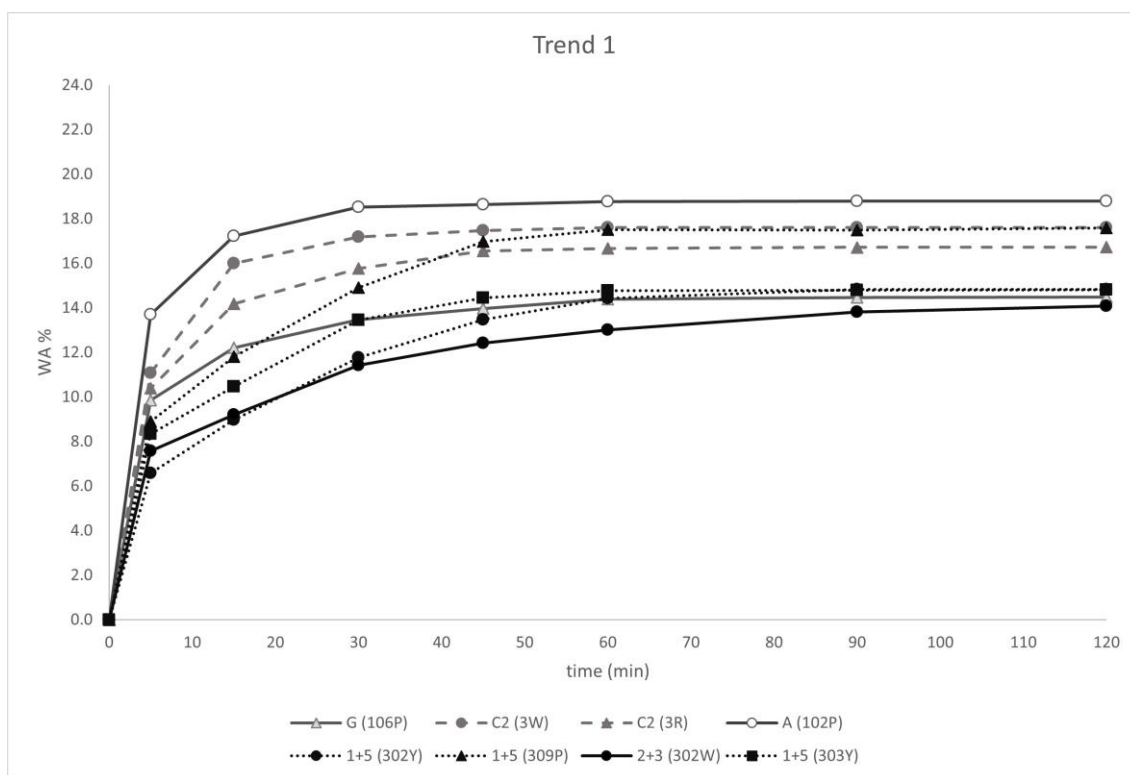

Figure S4 Water absorption curves: Trend 1.

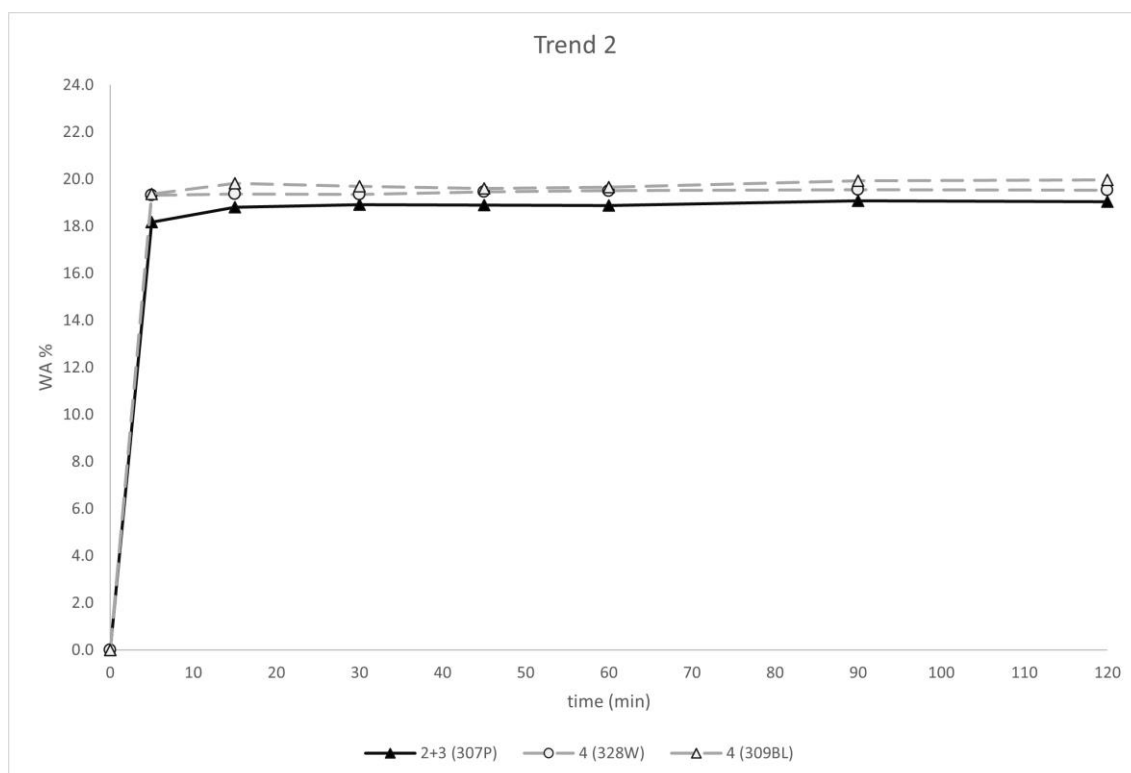

Figure S5 Water absorption curves: Trend 2.

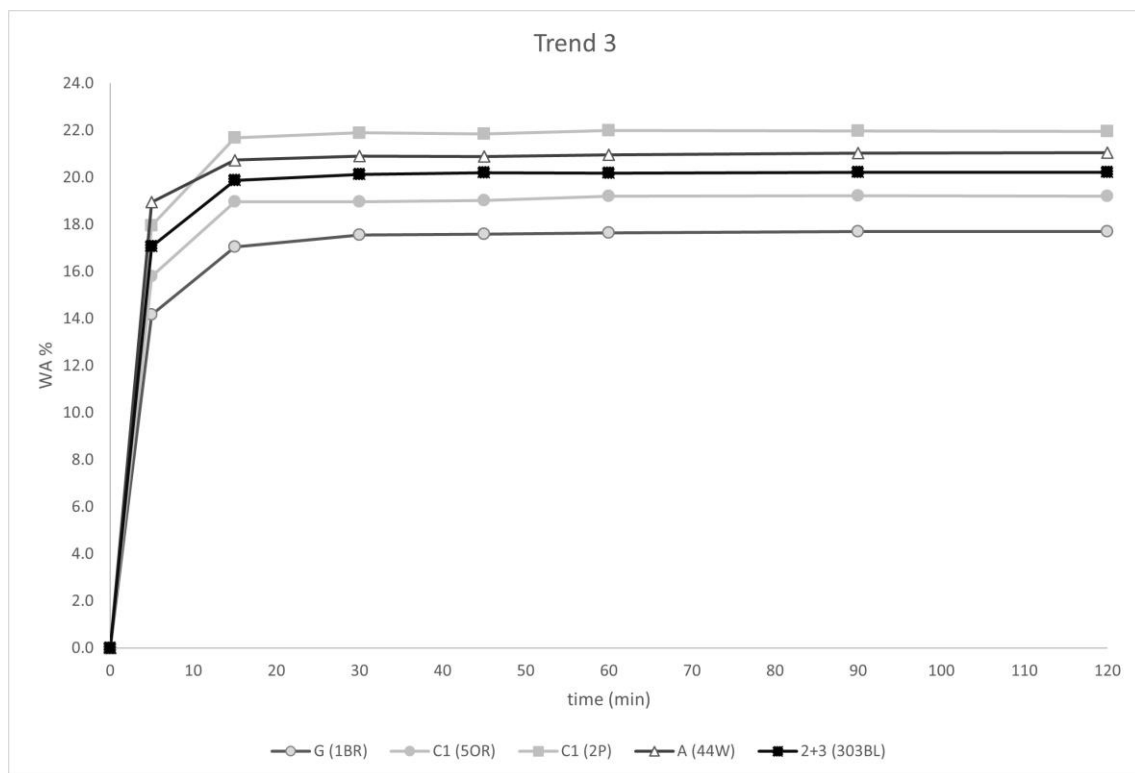

Figure S6. Water

absorption curves; Trend3.

## S5 TG-DSC analyses

Additional information about thermal analyses are reported here, along with specifications of temperature ranges taken into consideration and three supplementary thermograms.

Samples considered were: 2P\_C1 (side A), 303Y\_1+5 (side A), 309P\_1+5 (bulk) and 106P\_G (bulk) as representative of the majority of the pieces; 367BL\_6 (side A and bulk), in order to observe the thermal behaviour of gypsum in the surface and in the bulk; 41W\_A (bulk) since it presented a layered section.

In order to compare samples data, TG results are presented considering some temperature ranges, each one correlated to specific chemical reactions as follows (Cuomo di Caprio, 2007; Leach *et al.*, 2008):

- 100-200°C: loss of absorbed water (endothermic peak);
- 200-400°C: combustion of organic material (exothermic peak);
- 400-600°C: loss of chemically combined hydroxyl water by clay minerals (endothermic peak);
- >600°C: decomposition of calcite (endothermic peak);
- about 900°C: formation of high temperature phases from clay minerals (exothermic peak).



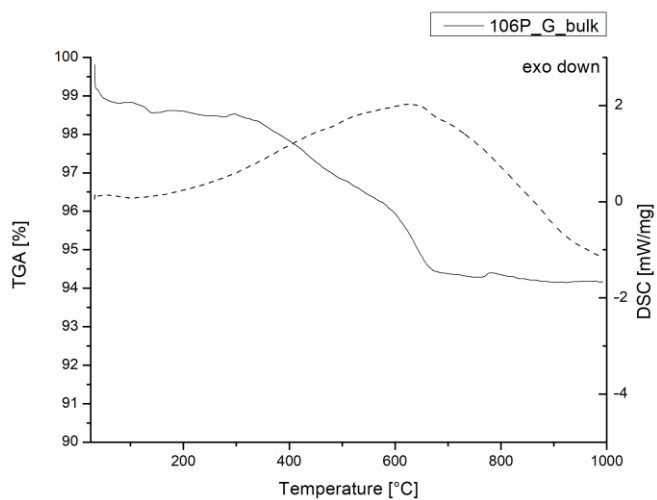

**Figure S7.** TG-DSC thermogram of sample 106P\_G\_bulk (DSC curve dotted).

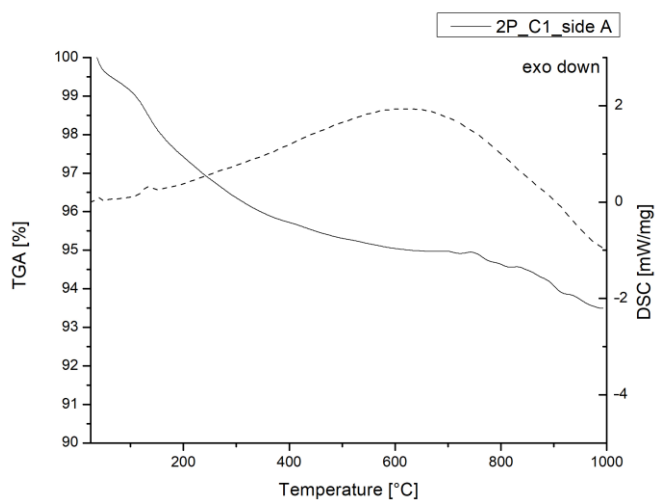

**Figure S8.** TG-DSC thermogram of sample 2P\_C1\_side A (DSC curve dotted).

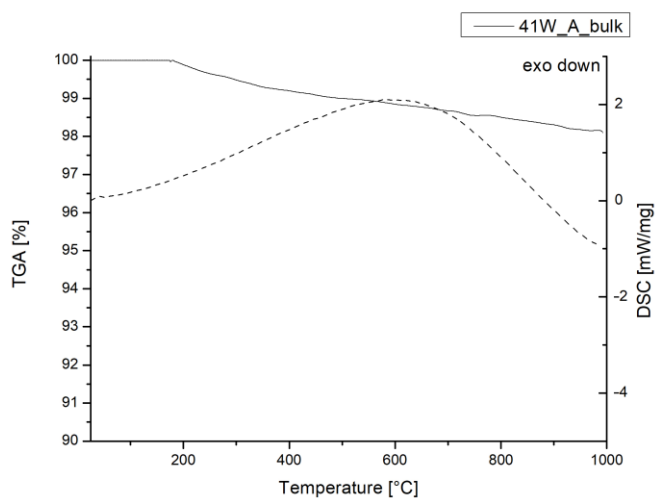

**Figure S9.** TG-DSC thermogram of sample 41W\_A\_bulk (DSC curve dotted).
